# Supplementary material for: Lacticaseibacillus paracasei GM-080 Ameliorates Allergic Airway Inflammation in Children with Allergic Rhinitis: From an Animal Model to a Double-Blind, Randomized, Placebo-Controlled Trial
Source: MDPI journal article supplement (doi:10.3390/cells12050768), 2023-02-28
Supplement: s1 [file s1]

**Lactacaseibacillus paracasei GM-080 Ameliorates Allergic Airway Inflammation  
in Children with Allergic Rhinitis: From an Animal Model to a Double-Blind,  
Randomized, Placebo-Controlled Trial**

En-Kwang Lin, Wen-Wei Chang, Jhih-Hua Jhong, Wan-Hua Tsai, Chia-Hsuan Chou  
and I-Jen Wang

## Supporting information

**Table S1** CRISPR loci, prophage-like clusters, and bacteriocin gene in the GM-080 genome.

| CRISPR loci     |                  |                           |                                     |                 |                          |                |                |                                                                                                                         |
|-----------------|------------------|---------------------------|-------------------------------------|-----------------|--------------------------|----------------|----------------|-------------------------------------------------------------------------------------------------------------------------|
| Position        |                  | Length                    | Repeat consensus                    |                 |                          | Repeat length  | Spacers number |                                                                                                                         |
| 1076933-1078354 |                  | 1421                      | GCTCTTGAAGTATTGATTCGACATCTACCTGAGAC |                 |                          | 36             | 21             |                                                                                                                         |
| Prophage        |                  |                           |                                     |                 |                          |                |                |                                                                                                                         |
| Locate          | Length           | Completeness <sup>a</sup> | Score                               | Region          | Position                 | Protein Number | GC (%)         |                                                                                                                         |
| Chr             | 44.6Kb           | intact                    | 130                                 | 760-45436       | info_outline             | 63             | 45.05          |                                                                                                                         |
|                 | 30.7Kb           | intact                    | 130                                 | 798774-829567   | info_outline             | 28             | 43.58          |                                                                                                                         |
|                 | 13.6Kb           | incomplete                | 20                                  | 1781477-1795130 | info_outline             | 12             | 45.38          |                                                                                                                         |
|                 | 31.5Kb           | intact                    | 130                                 | 2386341-2417905 | info_outline             | 43             | 44.26          |                                                                                                                         |
|                 | 34.1Kb           | intact                    | 141                                 | 2757738-2791893 | info_outline             | 47             | 45.64          |                                                                                                                         |
|                 | 39.6Kb           | intact                    | 144                                 | 2867742-2907382 | info_outline             | 54             | 45.29          |                                                                                                                         |
|                 | 64.6Kb           | intact                    | 137                                 | 3075976-3140658 | info_outline             | 95             | 44.55          |                                                                                                                         |
| Bacteriocin     |                  |                           |                                     |                 |                          |                |                |                                                                                                                         |
| Locate          | AOI <sup>b</sup> | start                     | end                                 | Class           | Organism                 | Uniprot        | PMID           | Sequence                                                                                                                |
| Chr             | AOI_01           | 126251                    | 129165                              | 143.2;LSEI_2386 | Carnobacterium piscicola | P38582.1       | -              | MDIKSQTLTYLNLSEAYKDPEVKANEFSLKLVVQCAGKLTASNSE<br>NSYIEVISLLSRGISSYYLSHKRIIPSSMLTIYTQIQKDIKNGNIDTE<br>KLRKYEIAKGLMSVPYIY |

<sup>a</sup> Prediction of prophage region: intact (score > 90), questionable (score 70–90) or incomplete (score < 70)

<sup>b</sup> AOI, area of interest. These are potential clusters responsible for the production of RiPPs and other bacteriocins.

**Table S2** Minimum inhibitory concentrations (MICs) of *L. paracasei* GM-080 toward eight antimicrobials and their microbiological cutoffs.

| Antibiotics     | EFSA cut-off <sup>a, b</sup> | GM-080 MIC <sup>a</sup> |
|-----------------|------------------------------|-------------------------|
| Ampicillin      | 4                            | 2~4                     |
| Gentamicin      | 32                           | 2~4                     |
| Kanamycin       | 64                           | 32~64                   |
| Streptomycin    | 64                           | 8~16                    |
| Erythromycin    | 1                            | 0.25                    |
| Clindamycin     | 1                            | 0.0625~0.125            |
| Tetracycline    | 4                            | 1                       |
| Chloramphenicol | 4                            | 4                       |

<sup>a</sup> g/L

<sup>b</sup> according to ref 17

**Table S3** EggNOG functional annotations of *L. paracasei* GM-080.

| Functional Categories                      | Gene    | egg NOG annotation                                                                                       | Brite                                               |
|--------------------------------------------|---------|----------------------------------------------------------------------------------------------------------|-----------------------------------------------------|
| Amino acid transport and metabolism (E)    | dppA    | D-aminopeptidase                                                                                         | Bacterial chemotaxis                                |
|                                            | pepA    | M42 glutamyl aminopeptidase                                                                              | Glutathione metabolism                              |
|                                            | yxwO    | ABC transporter                                                                                          | L-cystine transport                                 |
| Carbohydrate transport and metabolism (G)  | agaD    | PTS system mannose/fructose/sorbose family IID component                                                 | Galactose metabolism                                |
|                                            | kdul    | Catalyzes the isomerization of 5-dehydro-4-deoxy-D- glucuronate to 3-deoxy-D-glycero-2,5-hexodiululonate | Pentose and glucuronate interconversions            |
|                                            | kdgK    | pfkB family carbohydrate kinase                                                                          | Pentose phosphate pathway                           |
|                                            | ahaA    | PTS system fructose IIA component                                                                        | Biosynthesis of secondary metabolites               |
|                                            | xyIP    | MFS/sugar transport protein                                                                              | Glycosidases                                        |
|                                            | lacE    | Phosphotransferase system, EIIC                                                                          | Galactose metabolism                                |
|                                            | lacG    | Belongs to the glycosyl hydrolase 1 family                                                               | lactose/L-arabinose transport                       |
|                                            | lacF    | PTS system, Lactose/Cellobiose specific IIA subunit                                                      |                                                     |
| Replication, recombination and repair (L)  | recT    | RecT family                                                                                              | DSBR (double strand breaks repair)                  |
|                                            | pi112   | PDDEXK-like domain of unknown function (DUF3799)                                                         | prophage pi1 protein 12                             |
|                                            | tnpA1   | PFAM transposase, IS204 IS1001 IS1096 IS1165 family protein                                              | Chromosome and associated proteins                  |
|                                            | tnp1216 | DDE domain                                                                                               |                                                     |
|                                            | cas2    | CRISPR                                                                                                   | CRISPR-associated protein Cas2                      |
|                                            | cas1    | CRISPR                                                                                                   | CRISPR-associated protein Cas1                      |
|                                            | cas9    | CRISPR                                                                                                   | CRISPR-associated endonuclease Csn1                 |
|                                            | int3    | Belongs to the 'phage' integrase family                                                                  | Spliceosome                                         |
|                                            | pi346   | IstB-like ATP binding protein                                                                            | DNA replication protein DnaC                        |
|                                            | tnpR    | Resolvase, N terminal domain                                                                             |                                                     |
|                                            | is18    | Integrase core domain                                                                                    | putative transposase                                |
|                                            | yqaJ    | YqaJ-like viral recombinase domain                                                                       |                                                     |
|                                            | rusA    | Endodeoxyribonuclease RusA                                                                               | DNA repair and recombination proteins               |
| Cell wall/membrane/envelope biogenesis (M) | rfbP    | Bacterial sugar transferase                                                                              | undecaprenyl-phosphate galactose phosphotransferase |
|                                            | rgpAc   | Domain of unknown function (DUF1972)                                                                     | rgpA; rhamnosyltransferase                          |
|                                            | mprF    | lysyltransferase activity                                                                                | Two-component system                                |

**Table S4.** Putative IMa and CpG-containing ODN<sup>b</sup> contents in *L. paracasei* strains.

|         |            |                                      | GM-080    | BCRC 16100 | L9 <sup>c</sup> | HD1.7 <sup>c</sup> | Lpc10 <sup>c</sup> |
|---------|------------|--------------------------------------|-----------|------------|-----------------|--------------------|--------------------|
| Code    | Sequence   | Genome size (bp)                     | 3,140,923 | 3,029,023  | 3,076,440       | 3,039,280          | 3,052,120          |
| IM1     | TTAGGG     | Frequency                            | 292       | 276        | 187             | 184                | 193                |
|         |            | No. copies per 10 <sup>6</sup> bases | 93        | 91.1       | 60.8            | 60.5               | 63.2               |
| IM2     | TTTCGTTT   | Frequency                            | 103       | 78         | 54              | 52                 | 59                 |
|         |            | No. copies per 10 <sup>6</sup> bases | 32.8      | 25.8       | 17.6            | 17.1               | 19.3               |
| IM3     | TCAAGCTTGA | Frequency                            | 4         | 4          | 3               | 2                  | 3                  |
|         |            | No. copies per 10 <sup>6</sup> bases | 1.3       | 1.3        | 1.0             | 0.7                | 1.0                |
| ODN2216 | GACGATCGTC | Frequency                            | 1         | 3          | ND <sup>d</sup> | ND                 | ND                 |
|         |            | No. copies per 10 <sup>6</sup> bases | 0.3       | 1          | ND              | ND                 | ND                 |
| ODN2336 | ACGACGTCGT | Frequency                            | 1         | 1          | ND              | ND                 | ND                 |
|         |            | No. copies per 10 <sup>6</sup> bases | 0.3       | 0.3        | ND              | ND                 | ND                 |

<sup>a</sup> ODN, oligonucleotides.

<sup>b</sup> IM, immunosuppressive motif

<sup>c</sup> Information of three reference *Lactobacillus* strains were obtained from Mazhary Z et al., Inform. Med. Unlocked. 2020;18:100280.

<sup>d</sup> ND, not determined
